# Supplementary material
Source: PubMed Central journal article supplement (PMC7831993)
Supplement: mmc1.pdf [file mmc1.pdf]

# THE LANCET

## Child & Adolescent Health

### Supplementary appendix 1

This appendix formed part of the original submission and. We post it as supplied by the authors.

Supplement to: Gale C, Quigley M A, Placzek A, et al. Characteristics and outcomes of neonatal SARS-CoV-2 infection in the UK: a prospective national cohort study using active surveillance. *Lancet Child Adolesc Health* 2020; published online November 9. [http://dx.doi.org/10.1016/S2352-4642\(20\)30342-4](http://dx.doi.org/10.1016/S2352-4642(20)30342-4).

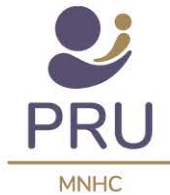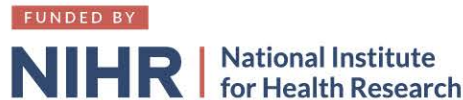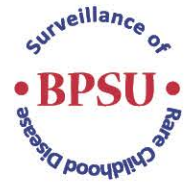

# Neonatal complications of coronavirus disease (COVID-19)

## Data Collection Form - Strictly Confidential

Please report all eligible babies admitted on or after **1st March 2020** and before **1st April 2021**

### Case Definition:

*(Please tick relevant box. If unable to do so, your case may not fulfil the case definition.)*

Any baby or infant

1. That has a diagnosis of COVID-19 made on a sample taken before 29 days of age and receives inpatient care for COVID-19 (this includes postnatal ward, neonatal unit, paediatric inpatient wards, PICU)

**OR**

2. Where the mother had confirmed COVID-19 at the time of birth or suspected COVID-19 at the time of birth that has subsequently been confirmed, and the baby was admitted for neonatal care (admitted for care on a neonatal unit regardless of the reason for admission and clinical course)

Please **do not** include any cases where the COVID-19 diagnosis in baby or mother **has not** been confirmed by laboratory testing.

A follow-up questionnaire may be sent within the first year after notification.  
Please keep a copy of this form as a record.

Version 2.2 (30/04/20)  
England, Wales and Scotland

## Section 1: Reporter details

- 1.1 Date of completion of questionnaire:   /   /
- 1.2 Consultant responsible for case: \_\_\_\_\_
- 1.3 a) Hospital name: \_\_\_\_\_  
b) Country: England  Wales  Scotland
- 1.4 Telephone number: \_\_\_\_\_  
Email: \_\_\_\_\_
- 1.5 Has the patient been transferred to/from another centre? Yes  No   
If Yes:  
1) Name of referring centre \_\_\_\_\_  
2) Referring consultant name \_\_\_\_\_
- 1.6 Name of person completing form (if not 1.2) \_\_\_\_\_

## Section 2: Infant case details (If multiple babies complete additional form)

- 2.1 NHS number: (or equivalent Scottish CHI)
- 2.2 Postcode: (ONLY include **first half of the postcode** e.g. NG7)
- 2.3 Sex: Male  Female   
Date of birth:   /   /    
Time of Birth:   :    
24hr
- 2.4 Gestation at birth: (e.g. 37+1)    +
- 2.5 Birthweight:     g  
Ethnicity\*:   Specify if any 'Other' background: \_\_\_\_\_

\*Please choose the correct ethnicity code from Appendix A

### Section 3: Maternal case details

Maternal details are essential to allow linkage with the maternal (UKOSS) surveillance

3.1 NHS number: (or equivalent Scottish CHI or Northern Irish Health & Social Care number)

3.2 Hospital name where this baby was delivered \_\_\_\_\_

3.3 Was this mother tested for COVID-19 in the 7 days before or 7 days after birth?

Yes  No (Go to Qu. 4.1)  Unsure

If Yes, did this confirm the diagnosis?

Yes  No

Sample source: \_\_\_\_\_

Date first positive sample taken / /

If there were further positive samples please give date(s) taken and sample source

1: / /  Sample Source \_\_\_\_\_

2: / /  Sample Source \_\_\_\_\_

If Yes, was the baby separated from the mother following birth? Yes  No

How was this done? \_\_\_\_\_

### Section 4: Pregnancy/birth details

4.1 Antenatal steroids given: None  Partial  Full

4.2 MgSO<sub>4</sub> given: Yes  No

4.3 Delivery mode: (Please tick one) Vaginal – spontaneous  Vaginal – forceps/ventouse   
Elective C-section  Emergency C-section  Not known

4.4 Multiple pregnancy: (Is there >1 fetus during pregnancy?)  
No  Not known  Yes  If Yes, birth order  of

4.5 Nulliparous: (Is this the first pregnancy?) Yes  No  Not known

4.6 Apgar score: at 5 mins  at 10 mins  Not known

4.7 Lowest cord pH: (either arterial or venous)  -  Not known   
Arterial  Venous  Not known

4.8 Did mother have any of the following in the 7 days before birth? (Please tick Yes/No/Not Known)

|                                         | Yes                      | No                       | Not known                |
|-----------------------------------------|--------------------------|--------------------------|--------------------------|
| Prolonged rupture of membranes (>24hrs) | <input type="checkbox"/> | <input type="checkbox"/> | <input type="checkbox"/> |
| Meconium stained liquor                 | <input type="checkbox"/> | <input type="checkbox"/> | <input type="checkbox"/> |
| Fever (>37.8°C)                         | <input type="checkbox"/> | <input type="checkbox"/> | <input type="checkbox"/> |

**4.9 Did the baby require any of the following at birth? (Please tick Yes/No/Not Known)**

|                               | Yes                      | No                       | Not known                |
|-------------------------------|--------------------------|--------------------------|--------------------------|
| Inflation/ventilation breaths | <input type="checkbox"/> | <input type="checkbox"/> | <input type="checkbox"/> |
| Intubation                    | <input type="checkbox"/> | <input type="checkbox"/> | <input type="checkbox"/> |
| Chest compressions            | <input type="checkbox"/> | <input type="checkbox"/> | <input type="checkbox"/> |
| Resuscitation drugs           | <input type="checkbox"/> | <input type="checkbox"/> | <input type="checkbox"/> |

**Section 5: Infant presentation/clinical features**

**5.1 Where did the baby receive medical care?**

Neonatal unit  PICU  Paediatric ward  Postnatal ward

**5.2 Was this baby tested for COVID-19?**

Yes  No (Go to Qu. 5.6)  Unsure

If Yes, did this confirm the diagnosis?

Yes  No

For each test performed for COVID-19, please state the source, date and result

| Sample source<br>(e.g. cord blood, NPA, stool) | Positive                 | Negative                 | Time taken                       | Date taken      |
|------------------------------------------------|--------------------------|--------------------------|----------------------------------|-----------------|
| 1.                                             | <input type="checkbox"/> | <input type="checkbox"/> | h h : m m<br><small>24hr</small> | D D / M M / Y Y |
| 2.                                             | <input type="checkbox"/> | <input type="checkbox"/> | h h : m m<br><small>24hr</small> | D D / M M / Y Y |
| 3.                                             | <input type="checkbox"/> | <input type="checkbox"/> | h h : m m<br><small>24hr</small> | D D / M M / Y Y |
| 4.                                             | <input type="checkbox"/> | <input type="checkbox"/> | h h : m m<br><small>24hr</small> | D D / M M / Y Y |
| 5.                                             | <input type="checkbox"/> | <input type="checkbox"/> | h h : m m<br><small>24hr</small> | D D / M M / Y Y |

**5.3 If COVID-19 positive, did the baby have any signs?**

Yes  No

If Yes, date of onset of signs of COVID-19

D D / M M / Y Y

**5.4 If COVID-19 positive, did the baby have immediate family or close contacts with sign/symptoms of COVID-19 when diagnosed?**

Yes  No  Unsure

If Yes, who? \_\_\_\_\_

**5.5 If COVID-19 positive, do you think the baby acquired this in hospital (nosocomial)?**

Yes  No

**5.6 Reason for admission** \_\_\_\_\_

**5.7 Did the baby have any of the following signs? (Please tick Yes/No/Not Known)**

|                                | Yes                      | No                       | Not known                |
|--------------------------------|--------------------------|--------------------------|--------------------------|
| Hyperthermia (>37.5°C)         | <input type="checkbox"/> | <input type="checkbox"/> | <input type="checkbox"/> |
| Hypothermia (<36.5°C)          | <input type="checkbox"/> | <input type="checkbox"/> | <input type="checkbox"/> |
| Apnoea                         | <input type="checkbox"/> | <input type="checkbox"/> | <input type="checkbox"/> |
| Cough                          | <input type="checkbox"/> | <input type="checkbox"/> | <input type="checkbox"/> |
| Coryza                         | <input type="checkbox"/> | <input type="checkbox"/> | <input type="checkbox"/> |
| Tachypnoea                     | <input type="checkbox"/> | <input type="checkbox"/> | <input type="checkbox"/> |
| Respiratory distress/recession | <input type="checkbox"/> | <input type="checkbox"/> | <input type="checkbox"/> |
| Oxygen requirement             | <input type="checkbox"/> | <input type="checkbox"/> | <input type="checkbox"/> |
| Lethargy                       | <input type="checkbox"/> | <input type="checkbox"/> | <input type="checkbox"/> |
| Hypotonia                      | <input type="checkbox"/> | <input type="checkbox"/> | <input type="checkbox"/> |
| Seizures                       | <input type="checkbox"/> | <input type="checkbox"/> | <input type="checkbox"/> |
| Poor feeding/vomiting          | <input type="checkbox"/> | <input type="checkbox"/> | <input type="checkbox"/> |
| Diarrhoea                      | <input type="checkbox"/> | <input type="checkbox"/> | <input type="checkbox"/> |
| Hypoglycaemia                  | <input type="checkbox"/> | <input type="checkbox"/> | <input type="checkbox"/> |
| Rash                           | <input type="checkbox"/> | <input type="checkbox"/> | <input type="checkbox"/> |
| Asymptomatic                   | <input type="checkbox"/> | <input type="checkbox"/> | <input type="checkbox"/> |

If Other, please specify: \_\_\_\_\_

**5.8 Other key investigations (use first result from point of suspicion/diagnosis of COVID-19 or following admission related to COVID-19)**

Chest X-Ray performed? Yes  No  Date

Findings: Normal  Pneumonia  Ground glass

If Other, please state: \_\_\_\_\_

Blood tests performed:

|                   | Positive             | Date taken                                                                                      |
|-------------------|----------------------|-------------------------------------------------------------------------------------------------|
| Haemoglobin _____ | (g/L)                | <input type="text" value="DD"/> <input type="text" value="MM"/> <input type="text" value="YY"/> |
| WBC _____         | (10 <sup>9</sup> /L) | <input type="text" value="DD"/> <input type="text" value="MM"/> <input type="text" value="YY"/> |
| Neutrophils _____ | (10 <sup>9</sup> /L) | <input type="text" value="DD"/> <input type="text" value="MM"/> <input type="text" value="YY"/> |
| Lymphocytes _____ | (10 <sup>9</sup> /L) | <input type="text" value="DD"/> <input type="text" value="MM"/> <input type="text" value="YY"/> |
| Platelets _____   | (10 <sup>9</sup> /L) | <input type="text" value="DD"/> <input type="text" value="MM"/> <input type="text" value="YY"/> |
| ALT _____         | (U/L)                | <input type="text" value="DD"/> <input type="text" value="MM"/> <input type="text" value="YY"/> |
| CRP _____         | (mg/L)               | <input type="text" value="DD"/> <input type="text" value="MM"/> <input type="text" value="YY"/> |
| Lactate _____     | (mmol/L)             | <input type="text" value="DD"/> <input type="text" value="MM"/> <input type="text" value="YY"/> |

If Other, please specify: \_\_\_\_\_

## Section 6: Other diagnoses and investigations

6.1 Did the baby have any major congenital abnormalities? Yes  No  Not known

If Yes, please provide details: \_\_\_\_\_

6.2 Was neuroimaging performed? Yes  No (Go to Qu. 6.3)  Not known

If Yes, were any of the following identified? If Yes, please state modality and date first identified:

| Finding                                   | Modality                                                     | Date first identified |
|-------------------------------------------|--------------------------------------------------------------|-----------------------|
| Normal                                    | Cr USS <input type="checkbox"/> MRI <input type="checkbox"/> | DD / MM / YY          |
| Grade I/II IVH                            | Cr USS <input type="checkbox"/> MRI <input type="checkbox"/> | DD / MM / YY          |
| Grade III/IV IVH                          | Cr USS <input type="checkbox"/> MRI <input type="checkbox"/> | DD / MM / YY          |
| Cystic periventricular leukomalacia (PVL) | Cr USS <input type="checkbox"/> MRI <input type="checkbox"/> | DD / MM / YY          |
| Hypoxic-ischaemic injury                  | Cr USS <input type="checkbox"/> MRI <input type="checkbox"/> | DD / MM / YY          |
| Congenital structural anomaly             | Cr USS <input type="checkbox"/> MRI <input type="checkbox"/> | DD / MM / YY          |

6.3 Please indicate if any of the following tests were performed:

|                 | Yes                      | No                       | Date         | Result                                                                               |
|-----------------|--------------------------|--------------------------|--------------|--------------------------------------------------------------------------------------|
| EEG or CFAM:    | <input type="checkbox"/> | <input type="checkbox"/> | DD / MM / YY | Normal <input type="checkbox"/><br>Seizures <input type="checkbox"/><br>Other: _____ |
| Echocardiogram: | <input type="checkbox"/> | <input type="checkbox"/> | DD / MM / YY | _____                                                                                |

## Section 7: Treatment/management of infant Only for infants who are COVID-19 positive

7.1 Please indicate if any of the following treatments were given for the treatment of COVID-19 (Please tick Yes/No/Not Known)

|                          | Yes                      | No                       | Not known                | Start date   | End date     |
|--------------------------|--------------------------|--------------------------|--------------------------|--------------|--------------|
| Oxygen                   | <input type="checkbox"/> | <input type="checkbox"/> | <input type="checkbox"/> | DD / MM / YY | DD / MM / YY |
| Non-invasive ventilation | <input type="checkbox"/> | <input type="checkbox"/> | <input type="checkbox"/> | DD / MM / YY | DD / MM / YY |
| Invasive ventilation     | <input type="checkbox"/> | <input type="checkbox"/> | <input type="checkbox"/> | DD / MM / YY | DD / MM / YY |
| HFOV                     | <input type="checkbox"/> | <input type="checkbox"/> | <input type="checkbox"/> | DD / MM / YY | DD / MM / YY |
| Nitric oxide             | <input type="checkbox"/> | <input type="checkbox"/> | <input type="checkbox"/> | DD / MM / YY | DD / MM / YY |
| Therapeutic hypothermia  | <input type="checkbox"/> | <input type="checkbox"/> | <input type="checkbox"/> | DD / MM / YY | DD / MM / YY |
| ECMO                     | <input type="checkbox"/> | <input type="checkbox"/> | <input type="checkbox"/> | DD / MM / YY | DD / MM / YY |

**7.2 Please indicate if any of the following treatments were given at the time of COVID-19 infection: (Please tick Yes/No)**

|                            | Yes                      | No                       | Start date   | Name of medication(s) |
|----------------------------|--------------------------|--------------------------|--------------|-----------------------|
| Antibiotics                | <input type="checkbox"/> | <input type="checkbox"/> | DD / MM / YY | _____                 |
| Antivirals                 | <input type="checkbox"/> | <input type="checkbox"/> | DD / MM / YY | _____                 |
| Postnatal steroids         | <input type="checkbox"/> | <input type="checkbox"/> | DD / MM / YY | _____                 |
| Anti-arrhythmic treatment  | <input type="checkbox"/> | <input type="checkbox"/> | DD / MM / YY | _____                 |
| Immunoglobulin             | <input type="checkbox"/> | <input type="checkbox"/> | DD / MM / YY | Not applicable        |
| Other experimental therapy | <input type="checkbox"/> | <input type="checkbox"/> | DD / MM / YY | _____                 |

**7.3 Do you think COVID 19 was predominantly responsible or significantly contributed to this neonates illness?** Yes  No

**Section 8: Outcome of infant**

**8.1 What was the final outcome? (Please tick all that apply)**

|                                      | Date of event                           |                         |
|--------------------------------------|-----------------------------------------|-------------------------|
| Discharged home:                     | <input type="checkbox"/> DD / MM / YY   |                         |
| Transferred (e.g. another hospital): | <input type="checkbox"/> DD / MM / YY   |                         |
| Still admitted:                      | <input type="checkbox"/> DD / MM / YY   | Questionnaire completed |
| Died:                                | <input type="checkbox"/> DD / MM / YY   |                         |
| Not known:                           | <input type="checkbox"/> Not applicable | Questionnaire completed |

**8.2 If discharged home, please indicate if any of the following are continued on discharge.**

|                                                   | Yes                      | No                       | Not known                |
|---------------------------------------------------|--------------------------|--------------------------|--------------------------|
| Home oxygen:                                      | <input type="checkbox"/> | <input type="checkbox"/> | <input type="checkbox"/> |
| Home pressure ventilatory support (CPAP or IPPV): | <input type="checkbox"/> | <input type="checkbox"/> | <input type="checkbox"/> |
| For palliation:                                   | <input type="checkbox"/> | <input type="checkbox"/> | <input type="checkbox"/> |
| Community nursing:                                | <input type="checkbox"/> | <input type="checkbox"/> | <input type="checkbox"/> |

**If discharged home, please indicate if any of the following follow up are organised.**

|                      |                          |                          |                          |
|----------------------|--------------------------|--------------------------|--------------------------|
| Follow up in clinic: | <input type="checkbox"/> | <input type="checkbox"/> | <input type="checkbox"/> |
|----------------------|--------------------------|--------------------------|--------------------------|

**8.3 If transferred, location transferred to: \_\_\_\_\_**

**8.4 If baby died, was a post-mortem (PM) performed?** Yes  No

**If Yes, was evidence of COVID-19 infection found on PM?** Yes  No

Please give brief details: \_\_\_\_\_



---

Thank you for taking the time to complete the Questionnaire

---

Please return the completed form via NHS.net email to:

[orh-tr.mbrace@nhs.net](mailto:orh-tr.mbrace@nhs.net)

Telephone: 01865 289733

---

Appendix A: Coding for Ethnic Group (ONS 2011 for UK wide data collection)

---

|                                                      | Ethnicity Code |                                                                                      |
|------------------------------------------------------|----------------|--------------------------------------------------------------------------------------|
| <b>A White</b>                                       | 1              | English / Welsh / Scottish / Northern Irish / British                                |
|                                                      | 2              | Irish                                                                                |
|                                                      | 3              | Gypsy or Irish Traveller                                                             |
|                                                      | 4              | Any other White background, please write <i>in Section B/C</i>                       |
| <b>B Mixed/ Multiple Ethnic Groups</b>               | 5              | White and Black Caribbean                                                            |
|                                                      | 6              | White and Black African                                                              |
|                                                      | 7              | White and Asian                                                                      |
|                                                      | 8              | Any other Mixed / Multiple ethnic background, please write <i>in Section B/C</i>     |
| <b>C Asian / Asian British</b>                       | 9              | Indian                                                                               |
|                                                      | 10             | Pakistani                                                                            |
|                                                      | 11             | Bangladeshi                                                                          |
|                                                      | 12             | Chinese                                                                              |
|                                                      | 13             | Any other Asian background, please write <i>in Section B/C</i>                       |
| <b>D Black / African / Caribbean / Black British</b> | 14             | African                                                                              |
|                                                      | 15             | Caribbean                                                                            |
|                                                      | 16             | Any other Black / African / Caribbean background, please write <i>in Section B/C</i> |
| <b>E Other ethnic group</b>                          | 17             | Arab                                                                                 |
