# Supplementary material
Source: PubMed Central journal article supplement (PMC7831993)
Supplement: mmc2.pdf [file mmc2.pdf]

# THE LANCET

## Child & Adolescent Health

### Supplementary appendix 2

This appendix formed part of the original submission and. We post it as supplied by the authors.

Supplement to: Gale C, Quigley M A, Placzek A, et al. Characteristics and outcomes of neonatal SARS-CoV-2 infection in the UK: a prospective national cohort study using active surveillance. *Lancet Child Adolesc Health* 2020; published online November 9. [http://dx.doi.org/10.1016/S2352-4642\(20\)30342-4](http://dx.doi.org/10.1016/S2352-4642(20)30342-4).

**Characteristics and outcomes of neonatal SARS-CoV-2 infection in the United Kingdom: a prospective national cohort study using active surveillance**

**Contents**

|                                                                                                                                            | page |
|--------------------------------------------------------------------------------------------------------------------------------------------|------|
| Details of the Neonatal complications of COVID-19 Collaborative Group                                                                      | 2    |
| Acknowledgements                                                                                                                           | 4    |
| Supplemental Table 1: Details for first SARS-CoV-2 positive sample                                                                         | 5    |
| Supplemental Table 2: Haematological and biochemical results at presentation in neonates with SARS-CoV-2 in hospital in the United Kingdom | 5    |

## Details of the Neonatal complications of COVID-19 Collaborative Group

### Writing committee

Chris Gale PhD<sup>a</sup>, Maria A Quigley MSc<sup>b</sup>, Anna Placzek MA<sup>b</sup>, Marian Knight DPhil<sup>b</sup>, Shamez Ladhani PhD<sup>c</sup>, Elizabeth S Draper PhD<sup>d</sup>, Don Sharkey PhD<sup>e</sup>, Cora Doherty MD<sup>f</sup>, Helen Mactier MD<sup>g</sup>, Jennifer J Kurinczuk MD<sup>b</sup>

<sup>a</sup> Reader in Neonatal Medicine, Imperial College London, School of Public Health, Faculty of Medicine, Chelsea and Westminster campus, 4<sup>th</sup> Floor, Lift Bank D, 369 Fulham Road, SW10 9NH, UK

<sup>b</sup> NIHR Policy Research Unit in Maternal and Neonatal Health and Care, National Perinatal Epidemiology Unit, Nuffield Department of Population Health, University of Oxford, UK

<sup>c</sup> Public Health England, Colindale, UK; Reader, St. George's University of London, UK

<sup>d</sup> Department of Health Sciences, University of Leicester, Centre for Medicine, University Road, Leicester, UK

<sup>e</sup> Academic Child Health, School of Medicine, University of Nottingham, UK

<sup>f</sup> University Hospital of Wales, Cardiff, UK

<sup>g</sup> Princess Royal Maternity and the University of Glasgow, Glasgow, UK

### Reporting clinicians

**Barnet Hospital** Dr Esther Freeman; **Birmingham Women's Hospital** Dr Gergely Toldi; **Brightmet Health Centre** Dr Gabrielle Lipshen; **Bristol Royal Hospital for Children** Dr Stefania Vergnano; **Chelsea & Westminster Hospital** Dr Catherine O'Sullivan; **Countess of Chester Hospital** Dr Ravi Jayaram; **Croydon University Hospital** Dr John Chang; **Derbyshire Children's Hospital** Dr Jennifer Evennett; **Ealing Hospital** Dr Ewa Lichtarowicz-Krynska; **Evelina Children's Hospital** Dr Emma Parish; **Hinchingbrooke Hospital** Dr Hilary Dixon; **Imperial College School of Medicine** Dr Simon Nadel; **Joyce Green Hospital** Dr Selwyn D'Costa; **Kings College Hospital** Dr Theodoros Dassios; **Leeds General Infirmary** Dr Elizabeth Evans, Dr Kerry Jeavons, Dr Sian Cooper; **Leicester Royal Infirmary** Dr Premkumar Sundaram; **Luton & Dunstable Hospital** Dr Doris Iyamabo; **Manor Hospital** Dr Rayasandra Gireesh; **Medway Maritime Hospital** Dr Ghada Ramadan; **Newham University Hospital** Dr Susan Liebeschuetz; **Norfolk & Norwich Univ Hospital** Dr Catherine Thomas; **Northwick Park Hospital** Ms Anam Fayadh; **Oxford University Hospitals** Dr Charles Roehr; **Peterborough City Hospital** Dr Katharine McDevitt; **Queen Elizabeth Hospital - Birmingham** Dr Manobi Borooah; **Queen Elizabeth Hospital - Lewisham and Greenwich** Dr Olutoyin Banjoko; **Queen Mary's Hospital for Children** Dr Daniel Langer; **Queen's Hospital - Romford** Dr Ambalika Das, Ms Helen Smith; **Queen's Medical Centre** Dr Don Sharkey; **Royal Berkshire & Battle Hospitals** Dr Chandan Yaliwal; **Royal Devon & Exeter Hospital** Dr Sian Ludman; **Royal Free Hospital** Dr James Rosenberg; **Royal Oldham Hospital** Dr Anita Vayalakkad; **Royal United Hospital** Dr Tobias Hunt; **Russells Hall Hospital** Dr Evans Chingwenje; **Southampton General Hospital** Dr Mark Johnson; **St George's Hospital Medical School** Dr Sijo Francis; **St Mary's Hospital - London** Dr Jayanta Banerjee; **St Peter's Hospital** Dr Vennila Ponnusamy; **Stoke Mandeville Hospital** Dr Gopa Sarkar; **The Royal London Hospital** Dr Nicolene Plaatjies; **University College Hospital London** Dr Sarah Eisen; **University Hospital Wishaw** Dr Augusta Anenih; **Victoria Hospital - Blackpool** Dr Christopher John Rawlingson; **Warrington**

**Hospital** Dr Colin Wong, Dr Delyth Webb; **Watford General Hospital** Dr Nazakat Merchant; **Wexham Park Hospital** Dr Kanaga Raj Sinnathuray; **William Harvey Hospital** Dr Amit Gupta

**British Paediatric Surveillance Unit, Royal College of Paediatrics and Child Health:** Richard Lynn, Jacob Avis

**Public, parent and patient involvement:** Charlotte Bevan and Rachel Plachcinski, **PPPI Leads Policy Research Unit in Maternal and Neonatal Health and Care**, who commented on the design, protocol and the public facing materials.

## **Acknowledgements**

We would also like to acknowledge the following groups who worked in extraordinary circumstances to expedite the process of getting this study set up within three weeks. Without their support and dedication, often working out of hour generally working from home, this would not have been possible to achieve.

**British Paediatric Surveillance Unit Scientific Committee**

**Confidentiality Advisory Group, Health Research Authority**

**Health Protection Scotland**

**Health Research Authority**

**Information Governance team, Nuffield Department of Population Health, University of Oxford**

**Information Services Division, Scotland**

**Members of the MBRRACE-UK third sector stakeholder group**

**Multicentre Research Ethics Committee**

**Northern Ireland Maternal and Child Health, Public Health Agency**

**Policy Research Programme, Department of Health and Social Care, England**

**Public Benefit and Privacy Panel for Health and Social Care, Scotland**

**Public Health England**

**Sponsors, Clinical Trials and Research Governance, Research Support, University of Oxford**

**Supplemental Table 1: Details for first SARS-CoV-2 positive sample**

| Sample                            | Number | Percentage |
|-----------------------------------|--------|------------|
| Nasal or throat swab              | 40     | 61%        |
| Nasopharyngeal aspirate           | 21     | 32%        |
| Sputum/endotracheal tube aspirate | 1      | 2%         |
| Missing                           | 4      | 6%         |

**Supplemental Table 2: Haematological and biochemical results at presentation in neonates with SARS-CoV-2 in hospital in the United Kingdom**

| Parameter                     | Number of cases | Median | Interquartile range | Range     |
|-------------------------------|-----------------|--------|---------------------|-----------|
| Haemoglobin (g/L)             | 54              | 165    | 145, 185            | 113, 246  |
| White cell count ( $10^9/L$ ) | 54              | 9.7    | 7.4, 12.3           | 2.8, 20.9 |
| Neutrophil count ( $10^9/L$ ) | 54              | 3.3    | 2.0, 6.6            | 0.7, 14.6 |
| Lymphocyte count ( $10^9/L$ ) | 53              | 3.8    | 2.9, 5.4            | 1.1, 36.2 |
| Platelet count ( $10^9/L$ )   | 54              | 272    | 225, 382            | 102, 633  |
| ALT (U/L)                     | 38              | 19.5   | 11, 31              | 6, 159    |
| C reactive protein (mg/L)     | 49              | 2      | 1, 6                | 0.3, 29   |
| Lactate (mmol/L)              | 31              | 2.1    | 1.5, 2.6            | 1.0, 3.9  |
